# Supplementary material for: Novel architecture of carbon nanotube decorated poly(methyl methacrylate) microbead vapour sensors assembled by spray layer by layer
Source: Royal Society of Chemistry journal article supplement (doi:10.1039/c0jm03779f), 2011-01-01
Supplement: c0jm03779f.pdf [file c0jm03779f.pdf]

## Supporting Information

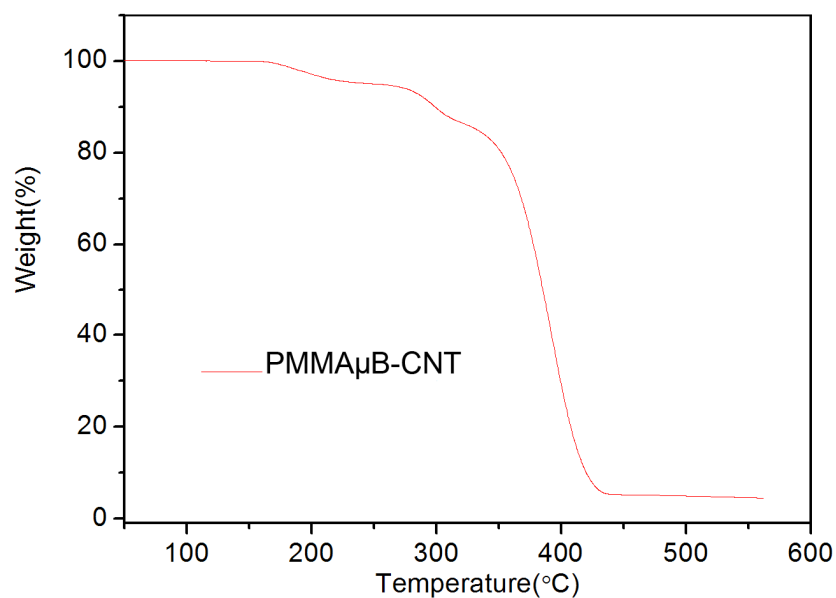

Figure 11: TGA curves of CNT-d-PMMA $\mu$ B

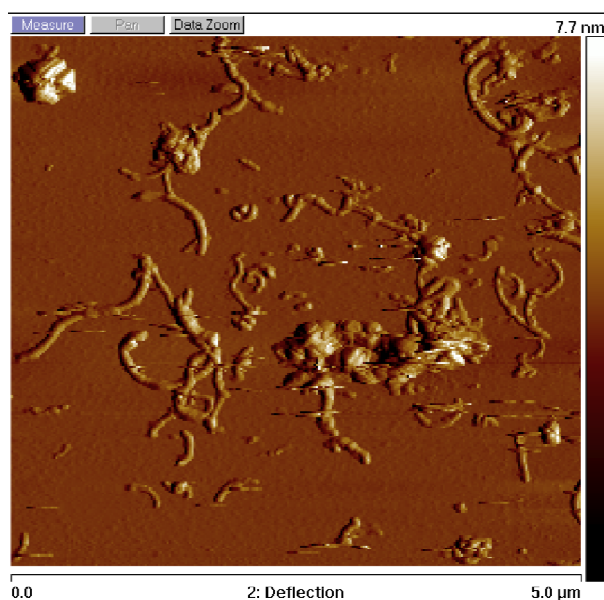

Figure 12: AFM characterization of CNT used in this study
